# Supplementary material for: Improving the Phloroglucinolysis Protocol and Characterization of Sagrantino Wines Proanthocyanidins
Source: MDPI journal article supplement (doi:10.3390/molecules26041087), 2021-02-19
Supplement: s1 [file s1]

*Supplementary materials*

# Improving the Phloroglucinolysis protocol and characterization of Sagrantino wines proanthocyanidins

Panagiotis Arapitsas <sup>1</sup>, Daniele Perenzoni <sup>1</sup> Graziano Guella <sup>2</sup> and Fulvio Mattivi <sup>1,3,\*</sup>

<sup>1</sup> Department of Food Quality and Nutrition, Research and Innovation Centre, Fondazione Edmund Mach, San Michele all'Adige (TN), Italy; [panagiotis.arapitsas@fmach.it](mailto:panagiotis.arapitsas@fmach.it) [daniele.perenzoni@fmach.it](mailto:daniele.perenzoni@fmach.it)

<sup>2</sup> Department of Physics, University of Trento, Via Sommarive 14, 38123 Povo Trento, Italy; [graziano.guella@unitn.it](mailto:graziano.guella@unitn.it)

<sup>3</sup> Department of Cellular, Computational and Integrative Biology - CIBIO, University of Trento, San Michele all'Adige, Italy; [fulvio.mattivi@unitn.it](mailto:fulvio.mattivi@unitn.it)

\* Correspondence: [fulvio.mattivi@unitn.it](mailto:fulvio.mattivi@unitn.it) Tel.: +39 0461615259

## Supplementary Material Description

1. Supplementary Figure S1. <sup>1</sup>H-NMR spectra of the flavanol phloroglucinol adducts.
2. Supplementary Figure S2. LC-MS chromatograms of the flavanols with and without the phloroglucinol adduct.
3. Supplementary Table S1. Wine samples data, meta-data, and quantitative analysis. (Separate excel file)
4. Supplementary Table S2. Anova Statistical analysis. (Separate excel file)

$^1\text{H}$ -NMR (400 MHz, acetone- $d_6$ , 300 K)

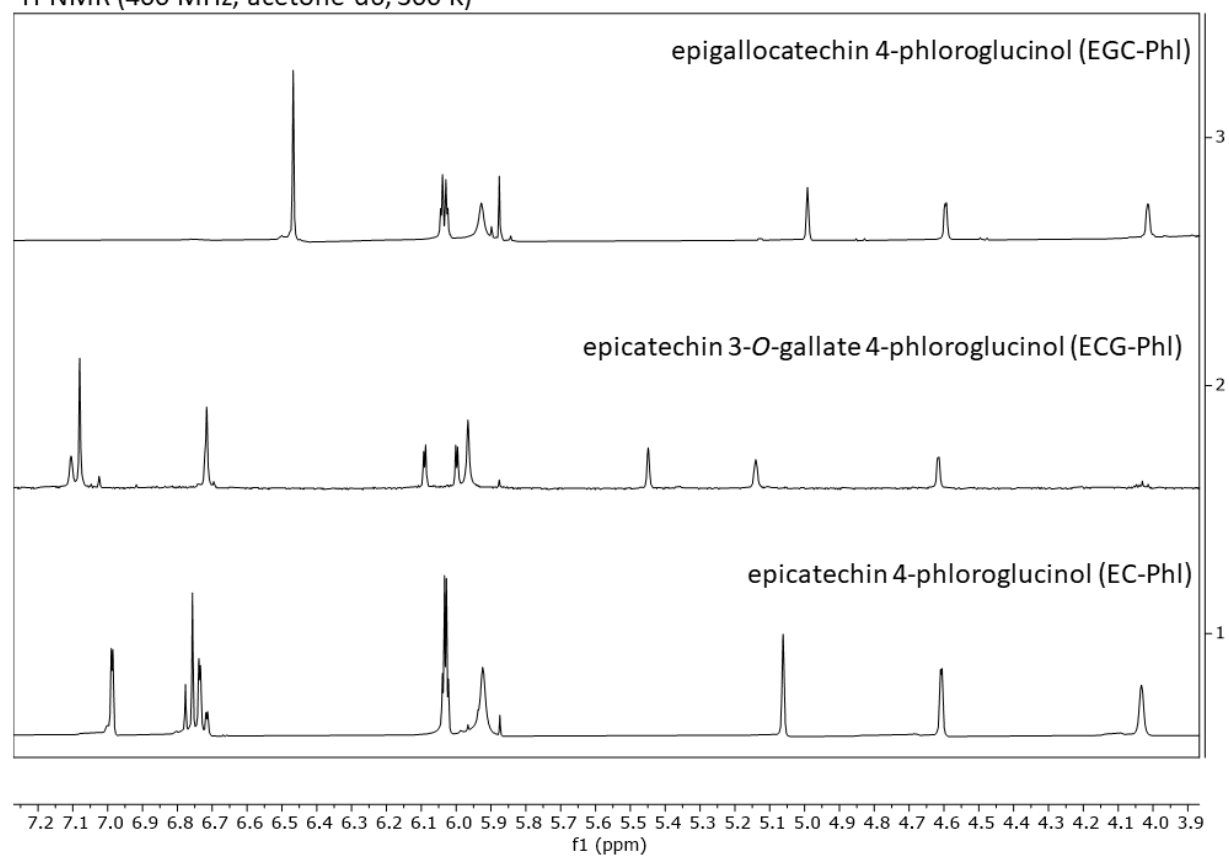

**Supplementary Figure S1.**  $^1\text{H}$ -NMR spectra of the flavanol phloroglucinol adducts.

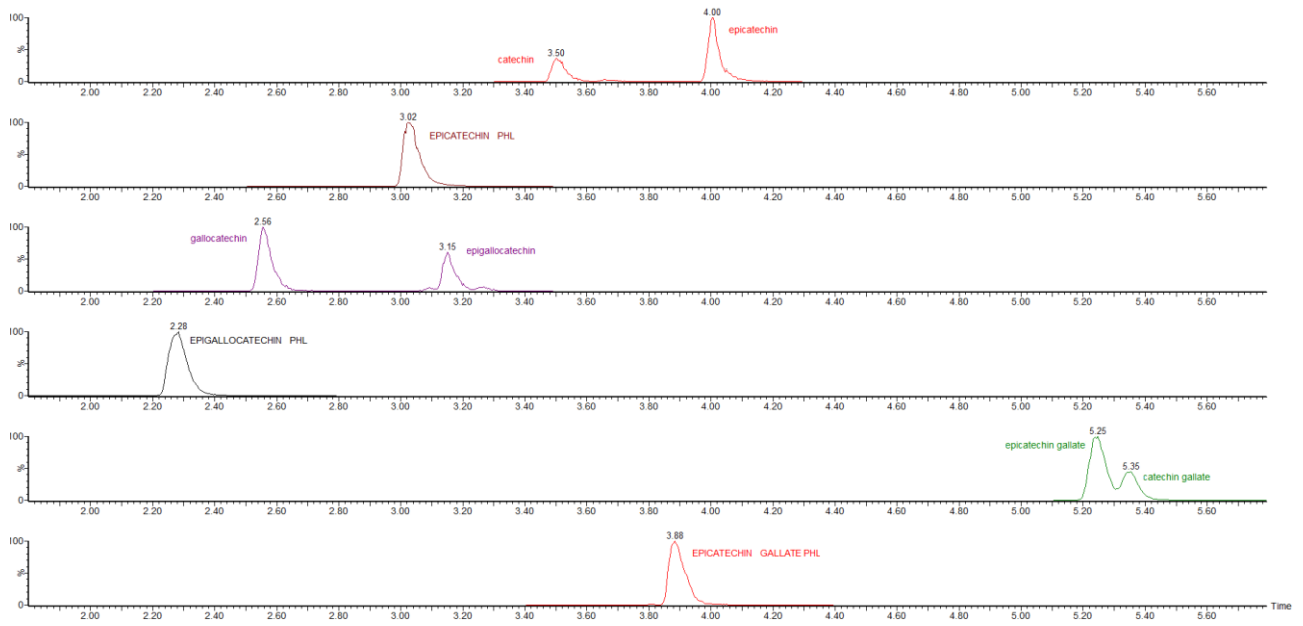

**Supplementary Figure S2.** LC-MS chromatograms of the flavanols with and without the phloroglucinol adduct.
